# Supplementary material
Source: PubMed Central journal article supplement (PMC3622520)
Supplement: NIHMS52768-supplement-Supp_Figures_Tables_Legends.pdf [file NIHMS52768-supplement-Supp_Figures_Tables_Legends.pdf]

## Legends for supplementary figures and tables:

**Figure S1: Expression of the engineered ETV6-RUNX1 fusion protein. (A)** In consonance with findings for other fusion oncogenes [Brian Huntly, personal communication], we were unable to detect the presence of the *ETV6-RUNX1* fusion protein in primary hematopoietic tissue extracts from *Etv6<sup>+ / RUNX11</sup>* mice (data not shown), so to demonstrate expression of our engineered fusion protein we modified the *pAML-IRES-SB-puro* targeting construct to add a Flag tag to the end of *RUNX11* sequence (by cloning in a PCR fragment generated with FWD primer: 5'-GCT CGC CGC CGC GCA TCC T-3' and REV primer: 5'-GGC CTT AAT TAA TCA CTT GTC GTC ATC GTC CT-3') and exchange the *Sleeping Beauty* (SB) for EGFP (by recombineering). **(B)** After targeting this construct into ES cells (*Etv6<sup>+ / RUNX11-Flag</sup>*), the Flag-tagged fusion protein was purified using immunoprecipitation of whole cell lysates. Western blotting using an anti-Flag antibody showed two bands, ~100 and ~110 KDa, representing translation starting from M1 and M43 alternative start codons. A Flag-tagged human *ETV6-RUNX1* cDNA transiently transfected into ES cells was used as a positive control for Western blotting, producing an ~110 kDa band.

**Figure S2: Characterisation of the *Etv6<sup>+ / RUNX1</sup>* allele *in vivo*. A.** Intercrossing of *Etv6<sup>+ / RUNX1</sup>* mice (on a mixed 129;C57 background) resulted in homozygotes (*Etv6<sup>RUNX1 / RUNX1</sup>* mice) only seen prior to embryonic day 10.5 (E10.5; representative images of E10.5 embryos from a *Etv6<sup>+ / RUNX1</sup>* intercross shown). **B.** Penetrance of the *Etv6<sup>+ / RUNX1</sup>* allele is modified by genetic background. The *Etv6<sup>+ / RUNX1</sup>* allele was generated in E14Tg2a ES cells (129P2Ola/Hsd genetic background) and the resulting chimaeras bred with either 129S5SvEv<sup>Brd</sup> or C57BL/6J wildtype mice for germline transmission. When the offspring (either on a 129 or mixed 129;C57 background) were bred with a C57BL/6J wildtype mouse, sub-Mendelian penetrance of the *Etv6<sup>+ / RUNX1</sup>* allele was observed (Chi-squared Test, 2-tailed; *P* = 0.0035). In contrast, sub-Mendelian penetrance was not observed (taking into account embryonic lethality of homozygous allele) when *Etv6<sup>+ / RUNX1</sup>* mice on a mixed 129;C57 background were intercrossed.

**Figure S3: Immunophenotyping hematological cells of the bone marrow from *Etv6<sup>+ / +</sup>* and *Etv6<sup>+ / RUNX1</sup>* mice.** Bone marrow from *Etv6<sup>+ / +</sup>* and *Etv6<sup>+ / RUNX1</sup>* mice at 3, 6 and 12 months of age was analysed by immunophenotyping on the flow cytometer using myeloid (Mac-1, Gr-1), T-cell (CD4) and B-cell (B220) markers. Results expressed as

percentage of the total cell population of the bone marrow (mean  $\pm$  SD, n=4-6 mice at each timepoint).

**Figure S4: Immunophenotyping of the B220+ bone marrow cells from *Etv6*<sup>+/*RUNX1*</sup> mice with BCP-ALL.** FACS plots from the bone marrow of representative mice demonstrate B220+ cells showing a Mac1<sup>+</sup>, CD43<sup>+</sup>, AA4.1<sup>+</sup>, CD24<sup>+</sup>, CD4<sup>-</sup>, CD19<sup>-</sup>, IgM<sup>-</sup>, IgD<sup>-</sup>, BP1<sup>-</sup>, IL7Ra<sup>-</sup> phenotype.

**Figure S5: A breakdown of the types of reads.** Leukemic genomic DNA from 73 *Etv6*<sup>+/*RUNX1*</sup>; *T2Onc*<sup>+/*Tg*</sup> (*ERONc*) mice were used in a ligation-mediated PCR method to produce barcoded PCR products that were pooled and sequenced on the 454 GS FLX System to generate 695,504 reads. After pre-processing the reads and aligning them to the mouse genome there were 341,320 uniquely aligned sequences (representing 51.5% of the reads; shown in dark blue). The remaining 48.5% of the reads were discarded due to the reasons listed in the key.

**Table S1. Gene expression analysis of *ETV6-RUNX1* BCP-ALL cases.** Gene expression data were obtained using splenic RNA from 15 *ETV6-RUNX1* BCP-ALL cases and 3 *ETV6-RUNX1* non-diseased mice and analysed on Illumina Mouse WG-6 v2.0 beadchips. Data were analysed and p-value adjusted (as described in the Methods) to yield a sorted list of differentially expressed genes. The differentially expressed genes with an adjusted p value <0.05 are listed. Differential expression levels are shown as log fold change (LogFC) in the BCP-ALL samples relative to the controls (a negative value indicates decreased expression).

**Table S2. Gene set enrichment analysis (GSEA).** GSEA was performed in which the genes with differential expression were sorted on the basis of gene function using Ingenuity Pathway Analysis software. The top 5 canonical pathways identified by the program are shown. The ratio shows the number of differentially expressed genes as a proportion of the total number of genes in that pathway.

**Table S3. Gaussian Kernel Convolution (GKC) common insertion sites (CIS) identified in all the samples (n=71 leukaemias).** \*Total number of insertions in the gene (this may be higher than the number of 'unique' insertions as some samples had multiple insertions in the same gene at different sites).
