# Supplementary material
Source: PubMed Central journal article supplement (PMC3622520)
Supplement: NIHMS52768-supplement-Table_S1.pdf [file NIHMS52768-supplement-Table_S1.pdf]

**Table S1. Gene expression analysis of *TEL-AML1* BCP-ALL cases.** Gene expression data were obtained using splenic RNA from 15 *ETV6-RUNX1* BCP-ALL cases and 3 *ETV6-RUNX1* non-diseased mice and analysed on Illumina Mouse WG-6 v2.0 beadchips. Data were analysed and p-value adjusted (as described in the Methods) to yield a sorted list of differentially expressed genes. The differentially expressed genes with an adjusted p value <0.05 are listed. Differential expression levels are shown as log fold change (LogFC) in the BCP-ALL samples relative to the controls (a negative value indicates decreased expression).

| Genomic location (chr:bp) | ReMOAT gene symbol   | Target ID            | Probe ID | LogFC  | Average expression | Adjusted p-value |
|---------------------------|----------------------|----------------------|----------|--------|--------------------|------------------|
| 17:8449487-8449536        | <i>Ccr6</i>          | <i>CCR6</i>          | 4590639  | -0.925 | 8.126              | 0.000            |
| 10:59644561-59644610      | <i>Chst3</i>         | <i>CHST3</i>         | 4050437  | -1.760 | 8.430              | 0.001            |
| 11:44607402-44607451      | <i>AK051309</i>      | <i>D130032J17RIK</i> | 1850474  | -2.026 | 8.182              | 0.002            |
| 12:114652832-114652881    | <i>abParts</i>       | <i>LOC380797</i>     | 630482   | -1.058 | 8.051              | 0.002            |
| 12:114653799-114653848    | <i>Igh</i>           | <i>LOC382646</i>     | 430139   | -1.310 | 8.104              | 0.003            |
| 17:46550651-46550700      | <i>Zfp318</i>        | <i>ZFP318</i>        | 4780093  | -1.237 | 8.964              | 0.003            |
| 17:8449913-8449962        | <i>Ccr6</i>          | <i>CCR6</i>          | 1010132  | -2.026 | 8.479              | 0.003            |
| 10:59644633-59644682      | <i>Chst3</i>         | <i>CHST3</i>         | 2810315  | -1.706 | 8.520              | 0.003            |
| 3:87189075-87189124       | <i>Fcrl1</i>         | <i>FCRL1</i>         | 6980440  | -1.051 | 8.141              | 0.003            |
| 3:87189076-87189125       | <i>Fcrl1</i>         | <i>FCRL1</i>         | 2490066  | -1.243 | 8.231              | 0.003            |
| 10:127527167-127527216    | <i>Atp5b</i>         | <i>ATP5B</i>         | 1470600  | 0.568  | 15.381             | 0.004            |
| 12:114646043-114646092    | <i>Igh</i>           | <i>LOC382646</i>     | 6980681  | -1.622 | 8.121              | 0.004            |
| 10:53695368-53695417      | <i>Man1a</i>         | <i>MAN1A</i>         | 1090332  | -0.761 | 7.764              | 0.004            |
| 4:32333305-32333354       | <i>AK051661</i>      | <i>D130062J21RIK</i> | 5390309  | -0.545 | 7.789              | 0.004            |
| 1:175628286-175628335     | <i>E430029J22Rik</i> | <i>LOC623121</i>     | 1090647  | -1.495 | 8.713              | 0.004            |
| 9:44320064-44320113       | <i>Cxcr5</i>         | <i>CXCR5</i>         | 50091    | -1.669 | 8.342              | 0.004            |
| 7:133552301-133552350     | <i>Cd19</i>          | <i>CD19</i>          | 6480746  | -1.360 | 8.114              | 0.004            |
| 12:114646044-114646093    | <i>Igh</i>           | <i>LOC382646</i>     | 2100564  | -1.314 | 8.255              | 0.004            |
| 7:31650987-31651036       | <i>Cd22</i>          | <i>CD22</i>          | 940504   | -1.627 | 8.227              | 0.005            |
| 19:44469115-44469164      | <i>Scd1</i>          | <i>SCD1</i>          | 3890274  | -2.147 | 8.908              | 0.005            |
| 9:70103619-70103668       | <i>AK090210</i>      | <i>G630019A19RIK</i> | 4760435  | -0.633 | 7.886              | 0.006            |
| 7:133552906-133552955     | <i>Cd19</i>          | <i>CD19</i>          | 6280037  | -1.643 | 8.277              | 0.006            |
| 9:70162037-70162086       | <i>AK082972</i>      | <i>4833444G19RIK</i> | 7550592  | -0.563 | 7.866              | 0.007            |
| 3:52157092-52157141       | <i>Foxo1</i>         | <i>FOXO1</i>         | 4290112  | -0.618 | 7.810              | 0.007            |
| 8:3682850-                | <i>Fcer2a</i>        | <i>FCER2A</i>        | 4590095  | -0.533 | 7.700              | 0.007            |

|                        |                      |                      |         |        |        |       |
|------------------------|----------------------|----------------------|---------|--------|--------|-------|
| 3682899                |                      |                      |         |        |        |       |
| 5:44260750-44260799    | <i>AK043442</i>      | <i>CD38</i>          | 2120477 | -0.473 | 7.745  | 0.009 |
| 7:51781460-51781509    | <i>Spib</i>          | <i>SPIB</i>          | 3840392 | -0.739 | 8.073  | 0.009 |
| 7:31651548-31651597    | <i>Cd22</i>          | <i>CD22</i>          | 5490608 | -0.961 | 7.987  | 0.009 |
| 6:67904395-67904444    | <i>abParts</i>       | <i>LOC635860</i>     | 5080382 | -0.587 | 7.758  | 0.009 |
| X:71024166-71024215    | <i>Srpk3</i>         | <i>SRPK3</i>         | 20465   | -1.740 | 8.380  | 0.009 |
| 11:44819589-44819638   | <i>Ebf1</i>          | <i>A730040I05RIK</i> | 4250605 | -0.734 | 8.115  | 0.009 |
| 7:69494739-69494788    | <i>Ndn</i>           | <i>NDN</i>           | 4490367 | -0.780 | 8.343  | 0.009 |
| 16:11661263-11661312   | <i>Snx29</i>         | <i>4933437K13RIK</i> | 3370037 | -0.884 | 8.235  | 0.010 |
| 19:41025454-41025503   | <i>Blnk</i>          | <i>BLNK</i>          | 4390661 | -0.655 | 7.897  | 0.010 |
| 2:121264974-121265023  | <i>Ell3</i>          | <i>ELL3</i>          | 6590368 | -1.907 | 8.483  | 0.011 |
| 14:63999590-63999639   | <i>Blk</i>           | <i>BLK</i>           | 2120343 | -0.457 | 7.655  | 0.011 |
| 19:11324445-11324494   | <i>Ms4a1</i>         | <i>MS4A1</i>         | 1780187 | -0.794 | 8.001  | 0.011 |
| 9:44320265-44320314    | <i>Cxcr5</i>         | <i>CXCR5</i>         | 1470408 | -2.099 | 8.723  | 0.011 |
| 14:63992007-63992056   | <i>Blk</i>           | <i>BLK</i>           | 3140491 | -2.129 | 8.691  | 0.011 |
| 1:95772914-95772963    | <i>Gal3st2</i>       | <i>GAL3ST2</i>       | 5130300 | -0.908 | 8.037  | 0.012 |
| 18:65614139-65614188   | <i>Malt1</i>         | <i>MALT-1</i>        | 4070768 | -0.679 | 8.022  | 0.012 |
| 14:63991868-63991917   | <i>Blk</i>           | <i>BLK</i>           | 3290279 | -2.558 | 8.783  | 0.014 |
| 1:175529358-175529405  | <i>E430029J22Rik</i> | <i>LOC623121</i>     | 4730246 | -0.588 | 7.788  | 0.015 |
| 8:3682848-3682897      | <i>Fcer2a</i>        | <i>FCER2A</i>        | 6520630 | -0.599 | 7.807  | 0.015 |
| 5:102981256-102981305  | <i>Arhgap24</i>      | <i>ARHGAP24</i>      | 3800528 | -0.521 | 7.651  | 0.015 |
| 7:50673331-50673380    | <i>Siglecg</i>       | <i>SIGLECG</i>       | 2850553 | -1.399 | 8.473  | 0.016 |
| 9:116486823-116486872  | <i>Rbms3</i>         | <i>RBMS3</i>         | 70497   | -0.627 | 7.928  | 0.016 |
| 19:41025453-41025502   | <i>Blnk</i>          | <i>BLNK</i>          | 6840424 | -1.081 | 8.112  | 0.017 |
| 16:14195025-14195074   | <i>Myh11</i>         | <i>MYH11</i>         | 510288  | -0.673 | 7.881  | 0.017 |
| 18:21814255-21814304   | <i>AK156636</i>      | <i>4930426D05RIK</i> | 3360674 | -0.969 | 8.073  | 0.017 |
| 12:117003598-117003647 | <i>abParts</i>       | <i>LOC677648</i>     | 610433  | -0.774 | 8.183  | 0.018 |
| 18:37347066-37347115   | <i>Pcdha6</i>        | <i>PCDHA7</i>        | 3120639 | -0.704 | 7.826  | 0.018 |
| 13:103494049-103494098 | <i>Cd180</i>         | <i>LY78</i>          | 2810220 | -0.533 | 7.988  | 0.018 |
| 14:64084105-64084154   | <i>Fam167a</i>       | <i>BC065085</i>      | 4040139 | -0.516 | 7.852  | 0.018 |
| 5:122691946-122691995  | <i>Hvcn1</i>         | <i>HVCN1</i>         | 7510008 | -1.772 | 10.248 | 0.019 |

|                        |                       |                                                                  |         |        |        |       |
|------------------------|-----------------------|------------------------------------------------------------------|---------|--------|--------|-------|
| 5:140816292-140816341  | <i>Snx8</i>           | SNX8                                                             | 60544   | -1.061 | 8.964  | 0.019 |
| 2:91052192-91052241    | <i>Acp2</i>           | ACP2                                                             | 5260253 | -0.701 | 8.867  | 0.020 |
| 13:24522406-24522455   | <i>Cmah</i>           | CMAH                                                             | 3140441 | -0.843 | 8.190  | 0.020 |
| 15:91618968-91619017   | <i>Lrrk2</i>          | 9330188B09RIK                                                    | 1580189 | -0.788 | 8.073  | 0.020 |
| 13:34720338-34720387   | <i>1300014I06Rik</i>  | 1300014I06RIK                                                    | 4880132 | -0.713 | 8.150  | 0.020 |
| 19:11532590-11532639   | <i>Ms4a4b</i>         | LY116                                                            | 5290327 | -0.422 | 7.731  | 0.020 |
| 5:65316201-65316250    | <i>Tlr1</i>           | TLR1                                                             | 6940719 | -0.718 | 8.120  | 0.022 |
| 1:172848244-172848293  | <i>Fcrla</i>          | FCRLA                                                            | 4050093 | -1.228 | 8.179  | 0.023 |
| 7:25686727-25686776    | <i>Cd79a</i>          | LOC100047815                                                     | 1340553 | -2.488 | 9.160  | 0.023 |
| 4:8712667-8712716      | <i>Chd7</i>           | CHD7                                                             | 1510041 | -0.718 | 8.164  | 0.023 |
| 15:91645103-91645152   | <i>Lrrk2</i>          | LRRK2                                                            | 7200209 | -0.951 | 8.238  | 0.023 |
| 15:57670992-57671041   | <i>Zhx2</i>           | ZHX2                                                             | 6350201 | -0.491 | 7.857  | 0.024 |
| 11:106174034-106174083 | <i>Cd79b</i>          | CD79B                                                            | 2060543 | -2.609 | 9.839  | 0.024 |
| 2:130895174-130895223  | <i>Siglec1</i>        | SIGLEC1                                                          | 4570458 | -1.384 | 8.305  | 0.024 |
| 5:96389686-96389735    | <i>Cxcl13</i>         | CXCL13                                                           | 3060040 | -2.351 | 9.108  | 0.024 |
| 6:41102146-41102195    | <i>TCR-beta_chain</i> | TRBV11_AE0006<br>63_T_CELL_REC<br>EPTOR_BETA_V<br>ARIABLE_11_244 | 1070689 | -0.671 | 7.634  | 0.025 |
| 11:106172863-106172912 | <i>Cd79b</i>          | CD79B                                                            | 2060373 | -2.864 | 10.506 | 0.026 |
| 8:3682151-3682200      | <i>Fcer2a</i>         | FCER2A                                                           | 2750706 | -1.553 | 8.284  | 0.026 |
| 11:61485756-61485805   | <i>Grap</i>           | GRAP                                                             | 510162  | -0.792 | 8.235  | 0.026 |
| X:133530699-133530748  | <i>Zcchc18</i>        | ZCCHC18                                                          | 3890750 | -1.356 | 8.926  | 0.029 |
| 7:138128572-138128621  | <i>Htra1</i>          | HTRA1                                                            | 6220703 | -1.001 | 8.540  | 0.029 |
| 2:180962481-180962530  | <i>BC006779</i>       | BC006779                                                         | 450706  | -0.951 | 8.752  | 0.030 |
| 7:138128732-138128781  | <i>Htra1</i>          | HTRA1                                                            | 6980093 | -1.028 | 8.307  | 0.030 |
| 9:13235818-13235867    | <i>Phxr4</i>          | PHXR4                                                            | 520286  | -1.583 | 8.955  | 0.030 |
| 6:68705065-68705114    | <i>abParts</i>        | LOC384410                                                        | 3390709 | -0.542 | 8.013  | 0.030 |
| 1:172848314-172848363  | <i>Fcrla</i>          | FCRLA                                                            | 1260477 | -2.236 | 8.915  | 0.030 |
| 10:122432461-122432510 | <i>Mon2</i>           | 2610528O22RIK                                                    | 3710687 | -0.514 | 9.828  | 0.031 |
| 11:3059934-3059983     | <i>AK007420</i>       | 4933439C20RIK                                                    | 7510390 | -1.726 | 9.246  | 0.032 |
| 5:64565164-64565213    | <i>mKIAA1108</i>      | LOC100046817                                                     | 4060452 | -1.402 | 8.751  | 0.032 |
| 4:41986290-41986339    | <i>Ccl21b</i>         | CCL21C                                                           | 6370475 | -2.430 | 8.781  | 0.032 |

|                        |                 |                      |         |        |        |       |
|------------------------|-----------------|----------------------|---------|--------|--------|-------|
| 9:108960013-108960062  | <i>Shisa5</i>   | <i>SCOTIN</i>        | 1260673 | -1.694 | 10.091 | 0.033 |
| 8:106971791-106971840  | <i>Ccdc79</i>   | <i>4933403K19RIK</i> | 1990315 | -0.449 | 7.562  | 0.033 |
| 5:122692182-122692231  | <i>Hvcn1</i>    | <i>HVCN1</i>         | 620646  | -1.682 | 9.864  | 0.033 |
| 10:67568316-67568365   | <i>AK145496</i> | <i>9930108O06RIK</i> | 3400521 | -0.398 | 7.909  | 0.033 |
| 2:124444504-124444553  | <i>AK030367</i> | <i>5330403J18RIK</i> | 5960500 | -0.728 | 8.513  | 0.033 |
| 17:34381196-34381245   | <i>H2-Ob</i>    | <i>H2-OB</i>         | 6760167 | -1.983 | 9.227  | 0.033 |
| 1:12851034-12851083    | <i>Sulf1</i>    | <i>SULF1</i>         | 7330086 | -0.595 | 8.149  | 0.033 |
| 1:172851775-172851824  | <i>Fcrla</i>    | <i>FCRLA</i>         | 5220176 | -0.991 | 8.079  | 0.034 |
| 10:41627921-41627970   | <i>Sesn1</i>    | <i>SESN1</i>         | 2480475 | -1.378 | 10.103 | 0.034 |
| 10:75412095-75412144   | <i>Vpreb3</i>   | <i>VPREB3</i>        | 4900500 | -1.328 | 8.595  | 0.035 |
| 6:116083604-116083653  | <i>Tmcc1</i>    | <i>E030038D23RIK</i> | 2710433 | -0.760 | 8.489  | 0.035 |
| 3:86550448-86550497    | <i>Lrba</i>     | <i>LRBA</i>          | 7040750 | -0.327 | 7.571  | 0.035 |
| 4:42249788-42249837    | <i>Ccl19</i>    | <i>LOC100043918</i>  | 1740196 | -1.776 | 8.524  | 0.035 |
| 4:94631204-94631253    | <i>Mysm1</i>    | <i>C130067A03RIK</i> | 2710681 | -0.418 | 7.766  | 0.035 |
| 4:138013791-138013840  | <i>Camk2n1</i>  | <i>CAMK2N1</i>       | 1580349 | -0.880 | 8.333  | 0.035 |
| 14:122310842-122310891 | <i>Gpr18</i>    | <i>GPR18</i>         | 2750543 | -1.794 | 9.124  | 0.035 |
| 9:70247389-70247438    | <i>Myo1e</i>    | <i>MYO1E</i>         | 5870201 | -1.301 | 8.793  | 0.036 |
| 16:20619006-20619055   | <i>Ece2</i>     | <i>1810009K13RIK</i> | 3450039 | 0.462  | 8.599  | 0.038 |
| 8:47004761-47004810    | <i>Pdlim3</i>   | <i>PDLIM3</i>        | 2000482 | -0.680 | 8.157  | 0.038 |
| 7:63034080-63034129    | <i>Siglech</i>  | <i>SIGLECH</i>       | 6220164 | -0.635 | 8.033  | 0.038 |
| 19:5651641-5651690     | <i>Sipa1</i>    | <i>SIPA1</i>         | 4760725 | -0.557 | 8.589  | 0.040 |
| 1:55227183-55227232    | <i>Rftn2</i>    | <i>RFTN2</i>         | 4860441 | -0.543 | 8.012  | 0.040 |
| 15:54670947-54670996   | <i>Enpp2</i>    | <i>ENPP2</i>         | 3360162 | -1.078 | 8.437  | 0.042 |
| 3:94783497-94783546    | <i>Pi4kb</i>    | <i>D330001D04RIK</i> | 4010594 | -0.443 | 8.461  | 0.042 |
| 11:100208683-100208732 | <i>Hap1</i>     | <i>HAP1</i>          | 1580309 | -1.019 | 8.832  | 0.042 |
| 2:180962608-180962657  | <i>BC006779</i> | <i>BC006779</i>      | 6420170 | -1.261 | 8.789  | 0.043 |
| 6:68686484-68686533    | <i>abParts</i>  | <i>IGK-V38</i>       | 830576  | -1.622 | 8.773  | 0.044 |
| 11:97898098-97898147   | <i>Stac2</i>    | <i>STAC2</i>         | 610047  | -0.413 | 7.811  | 0.045 |
| 7:25688334-25688383    | <i>AK040093</i> | <i>ARHGEF1</i>       | 6960608 | -1.057 | 8.855  | 0.045 |
| 4:43461151-43461200    | <i>Cd72</i>     | <i>CD72</i>          | 5700528 | -2.090 | 9.323  | 0.045 |
| 10:96081845-96081894   | <i>Btg1</i>     | <i>BTG1</i>          | 6480703 | -1.179 | 12.739 | 0.045 |

|                        |               |                 |         |        |        |       |
|------------------------|---------------|-----------------|---------|--------|--------|-------|
| 7:91081427-91081476    | 9930013L23Rik | 6330404C01RIK   | 2470228 | -0.945 | 8.228  | 0.045 |
| 13:113658077-113658126 | Skiv2l2       | SKIV2L2         | 4640670 | 0.973  | 10.351 | 0.045 |
| 13:30858541-30858590   | Irf4          | IRF4            | 1010397 | -1.187 | 8.523  | 0.045 |
| 3:87271043-87271092    | Fcrl5         | FCRL5           | 3450673 | -0.399 | 7.793  | 0.045 |
| 3:115589133-115589182  | AK137339      | SCL0002007.1_97 | 6400687 | -0.692 | 8.666  | 0.046 |
| 6:48519705-48519754    | Rarres2       | RARRES2         | 1260528 | -0.516 | 8.105  | 0.046 |
| 3:123194457-123194506  | Prss12        | PRSS12          | 4610446 | -0.278 | 7.609  | 0.046 |
| 14:75451779-75451825   | 5031414D18Rik | 5031414D18RIK   | 6560048 | -0.937 | 8.181  | 0.046 |
| 5:63048339-63048388    | AK040499      | A430103M24RIK   | 4060470 | -0.473 | 8.043  | 0.046 |
| 1:87578841-87578890    | Sp100         | SP100           | 6280221 | -0.916 | 8.895  | 0.046 |
| 4:155024881-155024930  | Mmp23         | MMP23           | 4180050 | -0.654 | 8.396  | 0.046 |
| 6:68221193-68221242    | abParts       | IGK-V5          | 2030372 | -1.646 | 9.553  | 0.046 |
| 19:34326262-34326311   | Acta2         | ACTA2           | 3130136 | -0.535 | 8.134  | 0.046 |
| 8:77624071-77624120    | Hmox1         | HMOX1           | 5050463 | -0.485 | 7.980  | 0.046 |
| 6:70024135-70024184    | abParts       | LOC100047053    | 5700347 | -1.070 | 8.226  | 0.047 |
| 10:96969288-96969337   | Dcn           | DCN             | 4280139 | -0.810 | 8.059  | 0.047 |
| 19:21671949-21671998   | 1110059E24Rik | 1110059E24RIK   | 4250343 | -0.902 | 9.370  | 0.047 |
| 1:53812465-53812514    | Stk17b        | STK17B          | 6270091 | -1.649 | 11.102 | 0.047 |
| 4:42248512-42248561    | Ccl19         | CCL19           | 4220717 | -1.901 | 9.017  | 0.047 |
| 6:68170563-68170612    | M19910        | LOC381776       | 3360687 | -1.575 | 8.586  | 0.048 |
| 5:40005562-40005611    | Hs3st1        | HS3ST1          | 4490445 | -1.025 | 8.570  | 0.048 |
| 1:122371247-122371296  | Marco         | MARCO           | 2850626 | -0.420 | 7.922  | 0.049 |
| 5:75594086-75594135    | Pdgfra        | PDGFRA          | 5290521 | -0.897 | 8.355  | 0.049 |
| 9:79616338-79616387    | Tmem30a       | D9WSU20E        | 780021  | -0.528 | 8.652  | 0.049 |
| 2:164896568-164896617  | Cd40          | CD40            | 4900309 | -0.461 | 7.929  | 0.049 |
| 4:42231944-42231993    | Ccl21a        | CCL21A          | 1710612 | -2.723 | 9.299  | 0.049 |
| 3:136373872-136373921  | AK051902      | D230017C05RIK   | 6560176 | -0.419 | 7.990  | 0.049 |
