# Supplementary material
Source: PubMed Central journal article supplement (PMC3622520)
Supplement: NIHMS52768-supplement-Table_S2.pdf [file NIHMS52768-supplement-Table_S2.pdf]

**Table S2. Gene set enrichment analysis (GSEA).** GSEA was performed in which the genes with differential expression were sorted on the basis of gene function using Ingenuity Pathway Analysis software. The top 5 canonical pathways identified by the program are shown. The ratio shows the number of differentially expressed genes as a proportion of the total number of genes in that pathway.

| <b>Pathway name</b>                                         | <b>p-value</b> | <b>Ratio</b>  |
|-------------------------------------------------------------|----------------|---------------|
| PI3K Signaling in B Lymphocytes                             | 2.70E-07       | 8/146 (0.055) |
| B Cell Development                                          | 2.70E-05       | 4/37 (0.108)  |
| Altered T Cell and B Cell Signaling in Rheumatoid Arthritis | 6.07E-05       | 5/92 (0.054)  |
| B Cell receptor Signalling                                  | 7.33E-05       | 6/157 (0.038) |
| Primary Immunodeficiency Signaling                          | 1.26E-04       | 4/63 (0.063)  |
