# Supplementary material
Source: PubMed Central journal article supplement (PMC3622520)
Supplement: NIHMS52768-supplement-Table_S3.pdf [file NIHMS52768-supplement-Table_S3.pdf]

**Table S3. Gaussian Kernel Convolution (GKC) common insertion sites (CIS) identified in all the samples (n=71 leukaemias).** \*Total number of insertions in the gene (this may be higher than number of number of 'unique' insertions as some samples had multiple insertions in the same gene at different sites).

| <b>CIS gene</b>      | <b>Peak_location (chr: basepair)</b> | <b>GKC scale</b> | <b>Insertions*</b> |
|----------------------|--------------------------------------|------------------|--------------------|
| <i>Cebpa</i>         | 7: 35890447                          | 15000            | 68                 |
| <i>Six4</i>          | 12: 74179957                         | 240000           | 48                 |
| <i>Intergenic</i>    | 7: 37321305                          | 15000            | 42                 |
| <i>Mecom</i>         | 3: 30037503                          | 15000            | 39                 |
| <i>Intergenic</i>    | 6: 31122809                          | 15000            | 39                 |
| <i>Foxp1</i>         | 6: 99136769                          | 15000            | 30                 |
| <i>Arfp1 Glt28d2</i> | 3: 85661804                          | 240000           | 27                 |
| <i>Defb42</i>        | 14: 63687942                         | 240000           | 26                 |
| <i>Ddx19b</i>        | 8: 113549394                         | 240000           | 25                 |
| <i>Cnr2</i>          | 4: 135467981                         | 15000            | 24                 |
| <i>Map6d1</i>        | 16: 20258171                         | 240000           | 24                 |
| <i>Fsd2</i>          | 7: 88702551                          | 240000           | 24                 |
| <i>Intergenic</i>    | 16: 21290121                         | 240000           | 22                 |
| <i>Osbp1a</i>        | 18: 12985983                         | 240000           | 22                 |
| <i>Sfi1</i>          | 11: 3069898                          | 15000            | 21                 |
| <i>Eif4e3</i>        | 6: 99274720                          | 15000            | 21                 |
| <i>Pcx</i>           | 19: 4603452                          | 120000           | 21                 |
| <i>Raf1</i>          | 6: 115597013                         | 120000           | 20                 |
| <i>Il2rb</i>         | 15: 78326059                         | 15000            | 20                 |
| <i>Serp1</i>         | 3: 58327662                          | 120000           | 20                 |
| <i>Pik3r5</i>        | 11: 68272127                         | 15000            | 19                 |
| <i>Rras2</i>         | 7: 121252464                         | 120000           | 19                 |
| <i>Csnk2a1</i>       | 2: 152088550                         | 240000           | 19                 |
| <i>Srpx2</i>         | X: 130451211                         | 240000           | 19                 |
| <i>Fam168a</i>       | 7: 107931262                         | 120000           | 19                 |
| <i>Epor</i>          | 9: 21768833                          | 15000            | 18                 |
| <i>9230109A22Rik</i> | 15: 25096146                         | 75000            | 18                 |
| <i>Slc16a10</i>      | 10: 39816003                         | 50000            | 17                 |
| <i>Mllt3</i>         | 4: 87566232                          | 75000            | 17                 |
| <i>Mecom</i>         | 3: 29906523                          | 15000            | 16                 |
| <i>Ets1</i>          | 9: 32513642                          | 15000            | 16                 |
| <i>Ikzf1</i>         | 11: 11653827                         | 15000            | 16                 |
| <i>Kit</i>           | 5: 75852607                          | 50000            | 16                 |
| <i>Frs2</i>          | 10: 116523739                        | 120000           | 16                 |
| <i>Cecr2</i>         | 6: 120608500                         | 120000           | 16                 |
| <i>Ccnd2</i>         | 6: 127152822                         | 30000            | 15                 |
| <i>Rasgef1a</i>      | 6: 118035931                         | 75000            | 15                 |
| <i>Nrp1</i>          | 8: 131032617                         | 120000           | 15                 |
| <i>Aldh1a2</i>       | 9: 71160731                          | 120000           | 15                 |
| <i>Ascl2</i>         | 7: 150162575                         | 15000            | 14                 |
| <i>Mef2c</i>         | 13: 83668056                         | 15000            | 14                 |
| <i>Bach2</i>         | 4: 32377764                          | 15000            | 14                 |
| <i>Col4a2</i>        | 8: 11336723                          | 50000            | 14                 |

|                      |               |       |    |
|----------------------|---------------|-------|----|
| <i>Intergenic</i>    | 13: 97620341  | 75000 | 14 |
| <i>Flt3</i>          | 5: 148211592  | 15000 | 13 |
| <i>Gata1</i>         | X: 7539896    | 15000 | 13 |
| <i>Myb</i>           | 10: 20858882  | 15000 | 13 |
| <i>3930402G23Rik</i> | 8: 10931226   | 50000 | 13 |
| <i>Spic</i>          | 10: 88146370  | 15000 | 12 |
| <i>Csf3r</i>         | 4: 125699379  | 15000 | 12 |
| <i>Ccnd3</i>         | 17: 47691927  | 15000 | 12 |
| <i>2610034M16Rik</i> | 17: 59130826  | 50000 | 12 |
| <i>Tcf12</i>         | 9: 71846598   | 30000 | 11 |
| <i>AC123870.3-1</i>  | 15: 102469493 | 30000 | 11 |
| <i>Rreb1</i>         | 13: 37926084  | 30000 | 11 |
| <i>Ano2</i>          | 6: 125817510  | 50000 | 11 |
| <i>Rasgrf1</i>       | 9: 89866066   | 15000 | 10 |
| <i>Acp6</i>          | 3: 96984231   | 30000 | 10 |
| <i>Fars2</i>         | 13: 36302975  | 50000 | 10 |
| <i>Clint1</i>        | 11: 45726366  | 30000 | 10 |
| <i>Nhedc1</i>        | 3: 135061001  | 50000 | 10 |
| <i>Xpo1</i>          | 11: 23214718  | 30000 | 10 |
| <i>Phf16</i>         | X: 20086940   | 50000 | 10 |
| <i>Intergenic</i>    | 11: 54065353  | 15000 | 9  |
| <i>Elmo1</i>         | 13: 20646492  | 30000 | 9  |
| <i>Crbn Trnt1</i>    | 6: 106732409  | 30000 | 9  |
| <i>Gm1968</i>        | 16: 29977681  | 15000 | 9  |
| <i>Chid1</i>         | 7: 148715091  | 50000 | 9  |
| <i>Snx29</i>         | 16: 11745111  | 50000 | 9  |
| <i>AC122769.1</i>    | 15: 55780830  | 50000 | 9  |
| <i>Prdm16</i>        | 4: 153963946  | 15000 | 8  |
| <i>Ssbp3</i>         | 4: 106568404  | 15000 | 8  |
| <i>Jak1</i>          | 4: 100879707  | 15000 | 8  |
| <i>Intergenic</i>    | 15: 3548669   | 30000 | 8  |
| <i>AC113961.3</i>    | 19: 29237198  | 50000 | 8  |
| <i>Kctd2</i>         | 11: 115287349 | 15000 | 7  |
| <i>Ash1l</i>         | 3: 88762314   | 15000 | 7  |
| <i>Irf4</i>          | 13: 30840234  | 15000 | 7  |
| <i>Stat5b</i>        | 11: 100684888 | 15000 | 7  |
| <i>Setd2</i>         | 9: 110459550  | 15000 | 7  |
| <i>Intergenic</i>    | 2: 167602993  | 15000 | 7  |
| <i>Erg</i>           | 16: 95608933  | 15000 | 7  |
| <i>Gja5</i>          | 3: 96748623   | 30000 | 7  |
| <i>Akt2</i>          | 7: 28388709   | 15000 | 6  |
| <i>Cebpe</i>         | 14: 55323489  | 15000 | 6  |
| <i>Csf2rb2</i>       | 15: 78135740  | 15000 | 6  |
| <i>Plag1</i>         | 4: 3858020    | 15000 | 6  |
| <i>Intergenic</i>    | 7: 152250219  | 15000 | 6  |
| <i>Plagl2</i>        | 2: 153065323  | 15000 | 6  |
| <i>Slc1a6</i>        | 10: 78236502  | 15000 | 6  |
| <i>Csf1r</i>         | 18: 61257836  | 15000 | 6  |
| <i>Intergenic</i>    | 13: 28929548  | 15000 | 6  |
| <i>Ambra1</i>        | 2: 91664213   | 15000 | 6  |

|                    |               |       |   |
|--------------------|---------------|-------|---|
| <i>Nf1</i>         | 11: 79273981  | 15000 | 6 |
| <i>Abcc4</i>       | 14: 119025799 | 30000 | 6 |
| <i>Pdpk1</i>       | 17: 24258342  | 15000 | 6 |
| <i>Sf1</i>         | 19: 6376208   | 15000 | 6 |
| <i>Hdac7</i>       | 15: 97657213  | 15000 | 5 |
| <i>Sox6</i>        | 7: 122885393  | 15000 | 5 |
| <i>D16H22S680E</i> | 16: 18332285  | 15000 | 5 |
| <i>AC135633.1</i>  | 19: 12924207  | 15000 | 5 |
