# Supplementary material
Source: PubMed Central journal article supplement (PMC3622520)

Figure S1

**A**

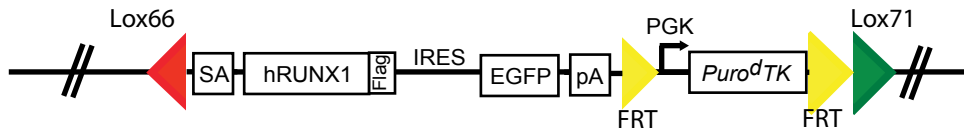

**B**

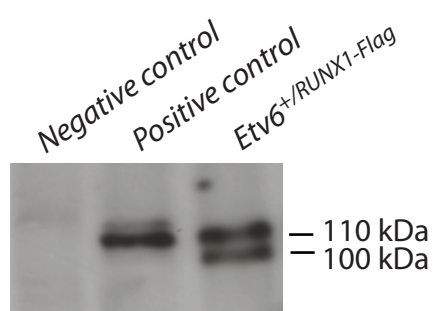

Supplement: NIHMS52768-supplement-Figure_S1.pdf [file NIHMS52768-supplement-Figure_S1.pdf]

**Figure S2**

**A**

| Age   | <i>Etv6</i> <sup>+/+</sup> | <i>Etv6</i> <sup>+/RUNX1</sup> | <i>Etv6</i> <sup>RUNX1/RUNX1</sup> |
|-------|----------------------------|--------------------------------|------------------------------------|
| 3 wks | 40                         | 54                             | 0                                  |
| E10.5 | 9                          | 16                             | 11                                 |

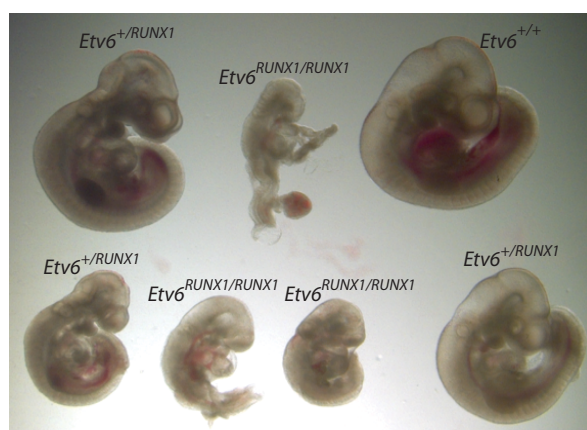

**B**

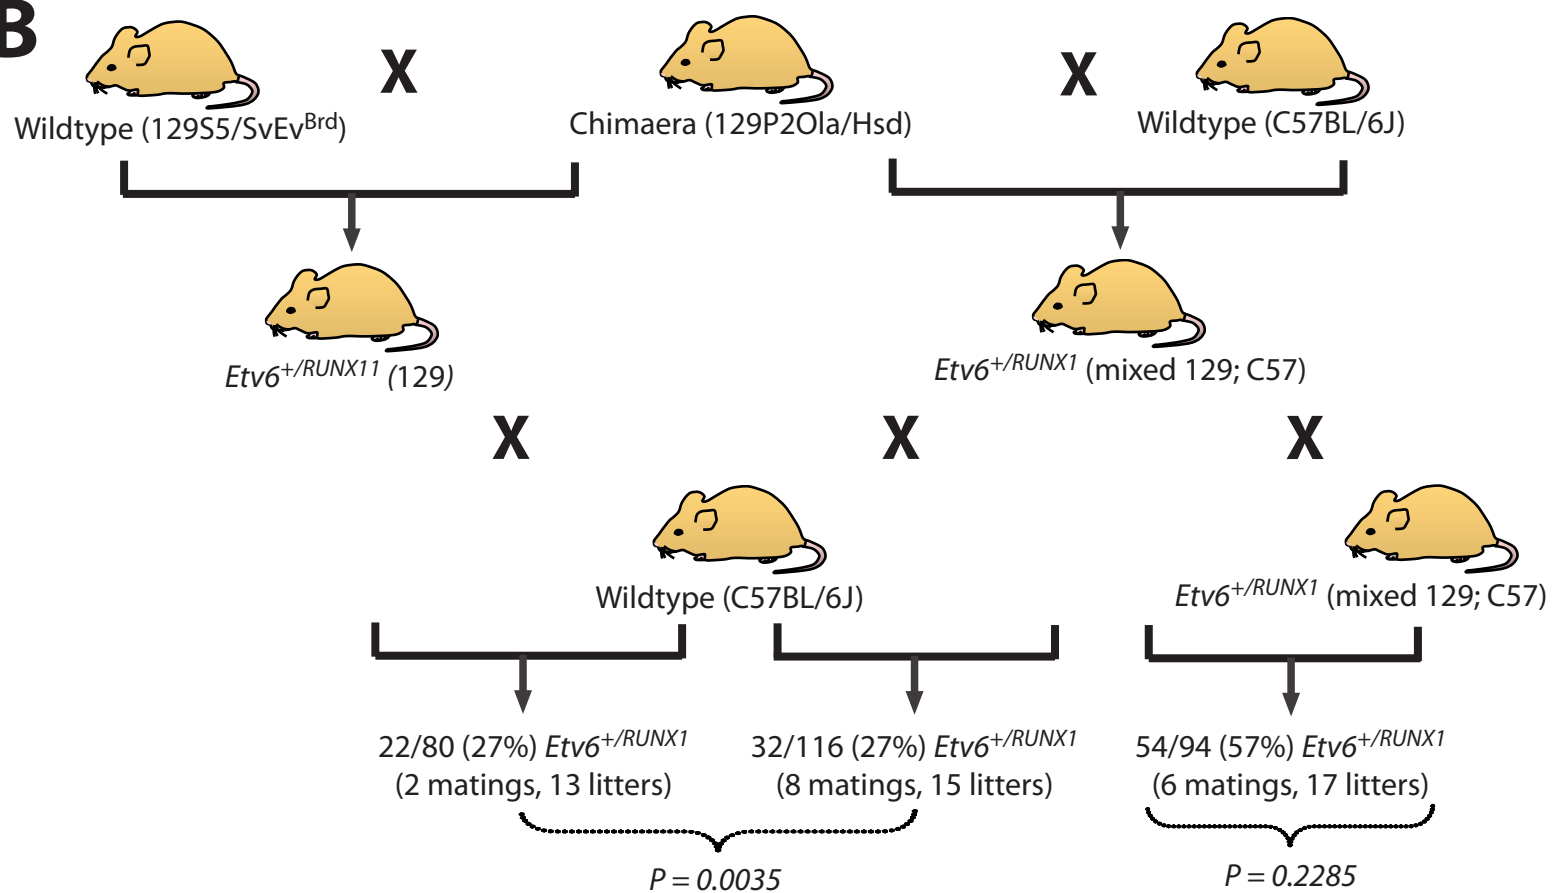

Supplement: NIHMS52768-supplement-Figure_S2.pdf [file NIHMS52768-supplement-Figure_S2.pdf]

**Figure S3**

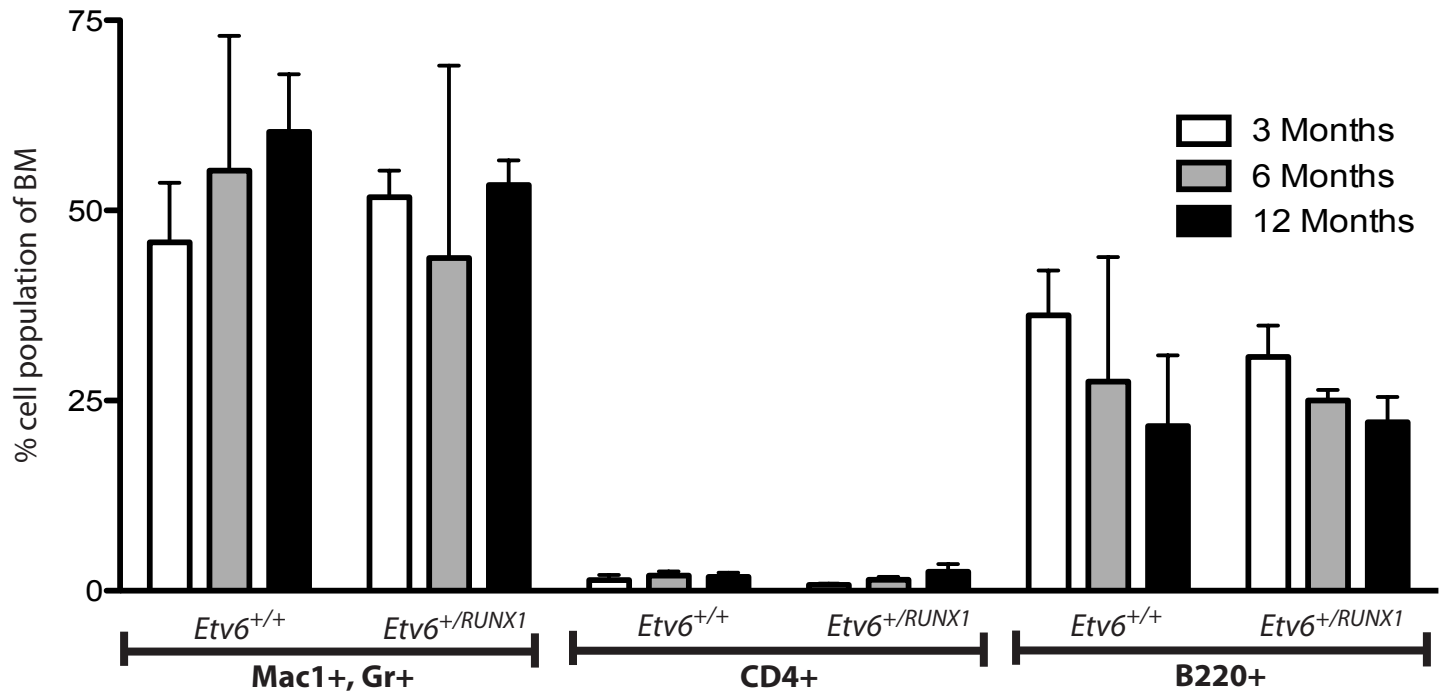

Supplement: NIHMS52768-supplement-Figure_S3.pdf [file NIHMS52768-supplement-Figure_S3.pdf]

Figure S4

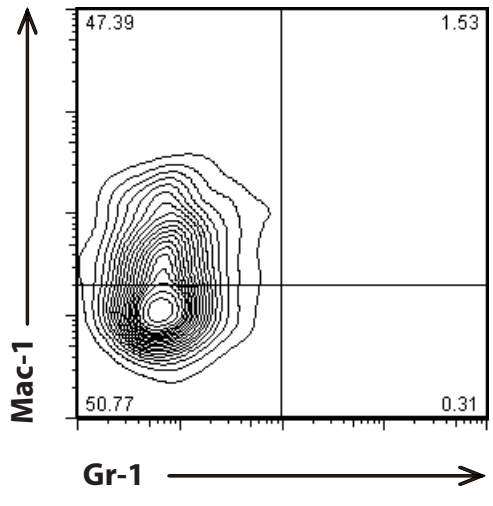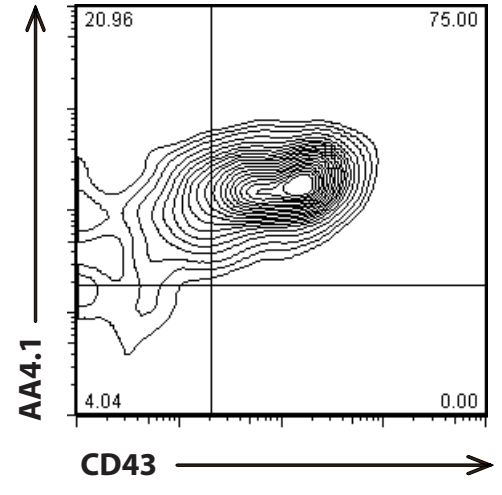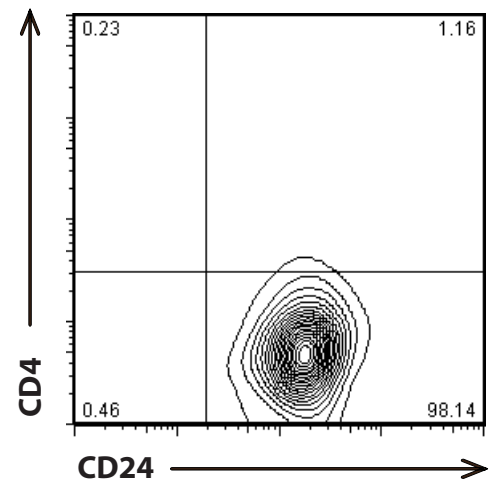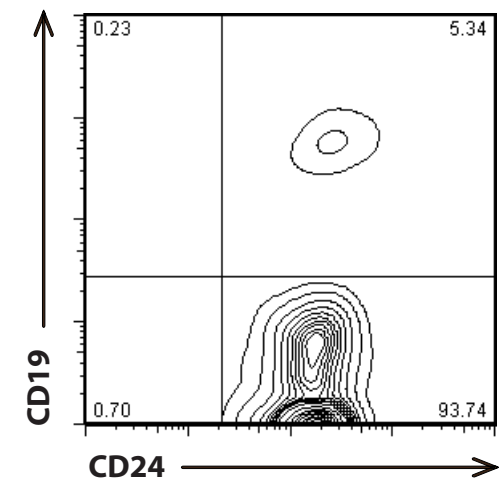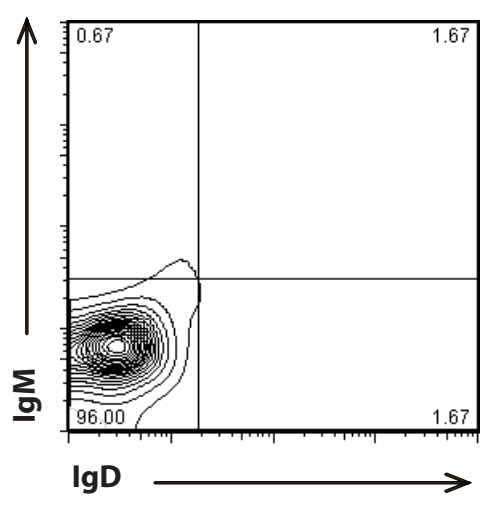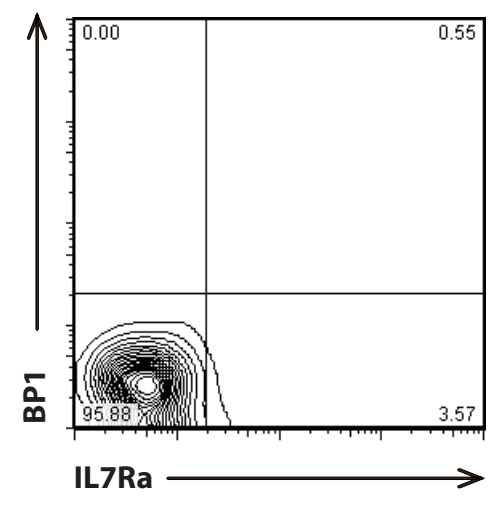

Supplement: NIHMS52768-supplement-Figure_S4.pdf [file NIHMS52768-supplement-Figure_S4.pdf]

Figure S5

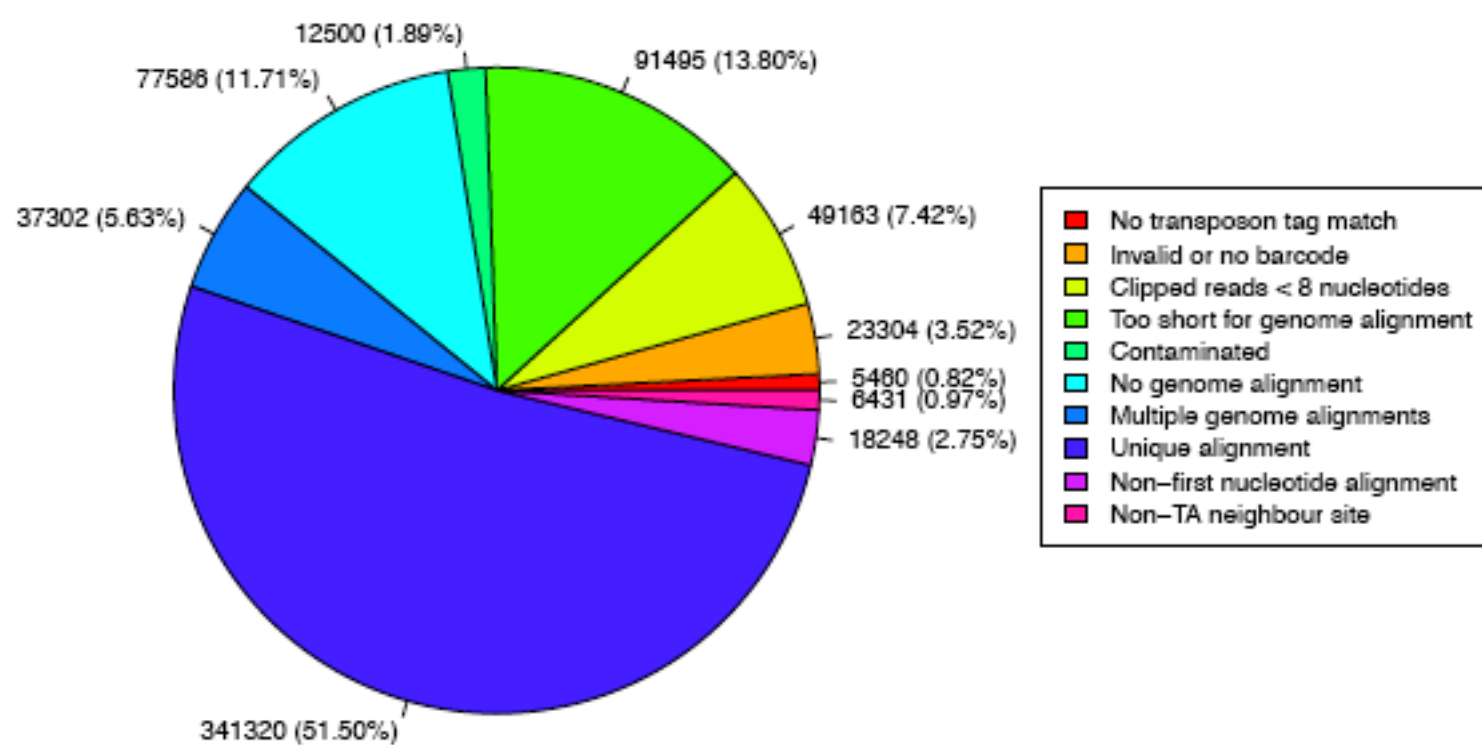

Supplement: NIHMS52768-supplement-Figure_S5.pdf [file NIHMS52768-supplement-Figure_S5.pdf]
